# Supplementary material for: Improving the anode performances of TiO2–carbon–rGO composites in lithium ion batteries by UV irradiation
Source: Royal Society of Chemistry journal article supplement (doi:10.1039/c5nj01855b), 2015-01-01
Supplement: c5nj01855b1.pdf [file c5nj01855b1.pdf]

## Electronic Supplementary Information (ESI) for Improving the anode performances of TiO<sub>2</sub>-carbon-rGO composites in lithium ion batteries by UV irradiation

Xiujun Zhang,<sup>a</sup> Juan Zhang,<sup>a</sup> Yanyan Liu,<sup>a</sup> Xiangyu Wang,<sup>a</sup> and Baojun Li<sup>\*a</sup>

<sup>a</sup> College of Chemistry and Molecular Engineering, Zhengzhou University, 100 Science Road, Zhengzhou 450001, P R China

\* Corresponding Author. E-mail: lbjfc1@zzu.edu.cn (B.J. Li).

### Experimental section

Cyclic voltammetry (CV) measurements were conducted on an electrochemistry workstation (CHI660E). The electrochemical impedance spectroscopy (EIS) measurements also were performed over a frequency range from 10<sup>5</sup> to 10<sup>-2</sup> Hz at the amplitude of the sinusoidal voltage of 5 mV and RT on the same electrochemistry workstation.

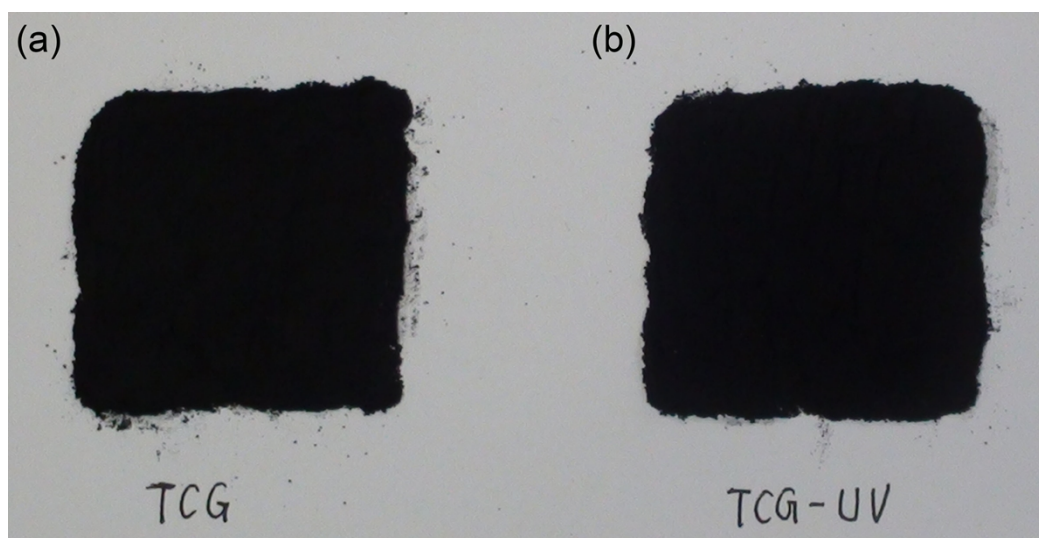

**Figure S1.** Photo images of (a) TCG and (b) TCG-UV.

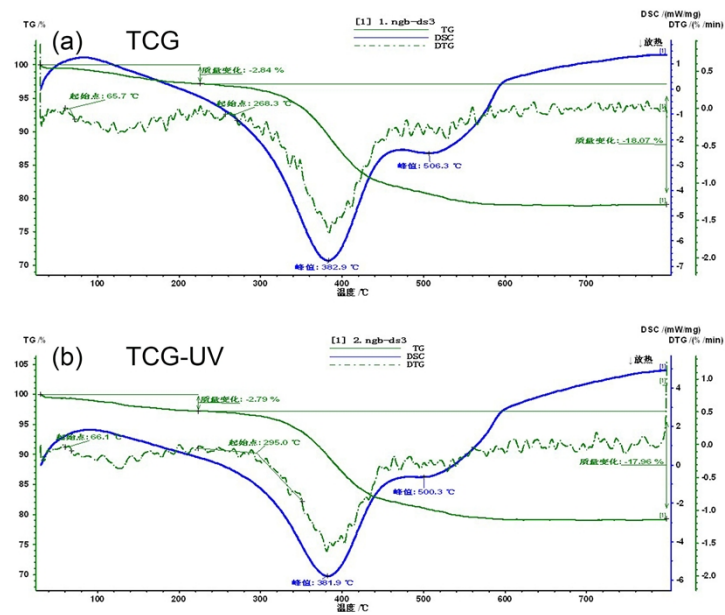

**Figure S2.** TG and DSC curves of (a) TCG and (b) TCG-UV measured in air atmosphere.

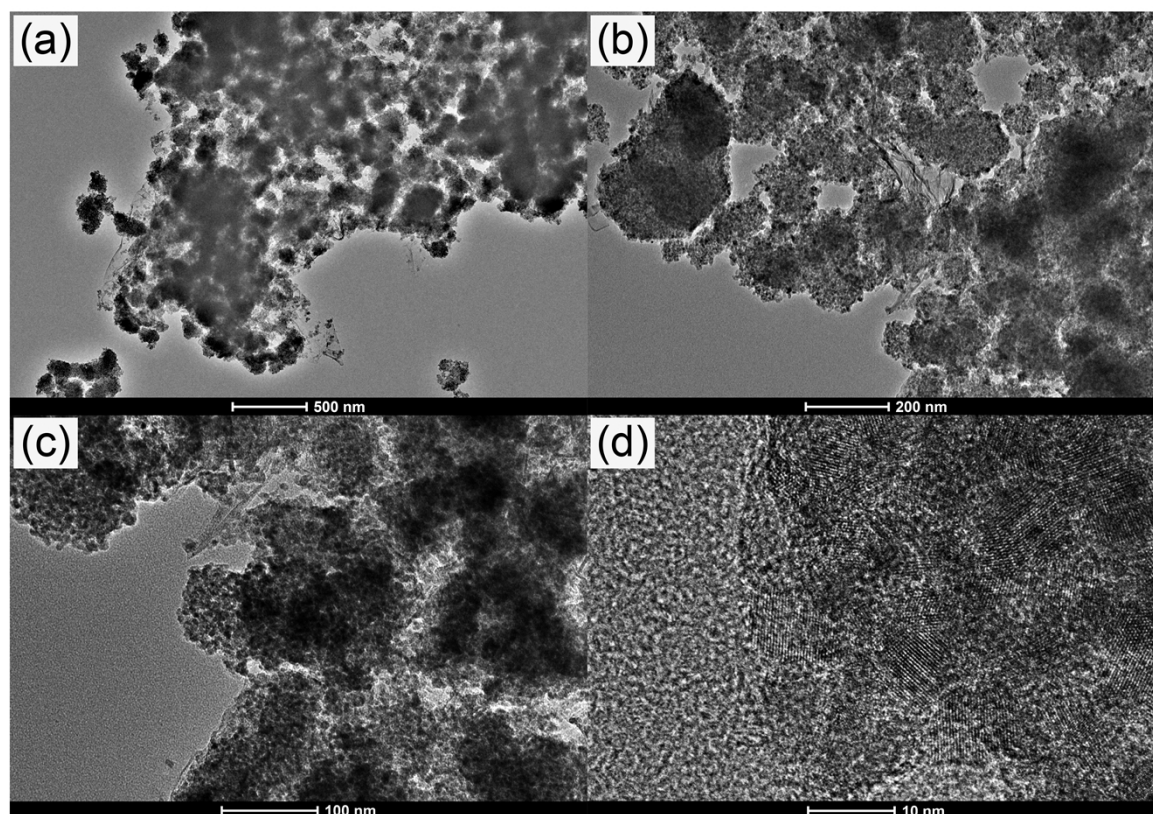

**Figure S3.** TEM images of TCG.

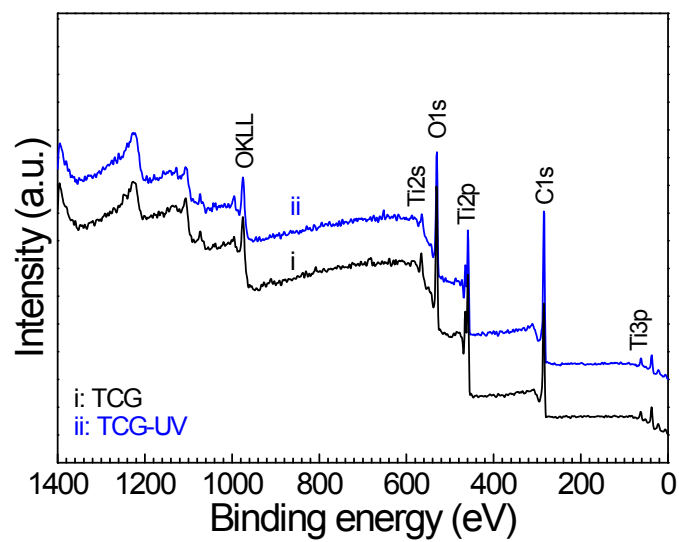

**Figure S4.** XPS spectrum of TCG and TCG-UV.

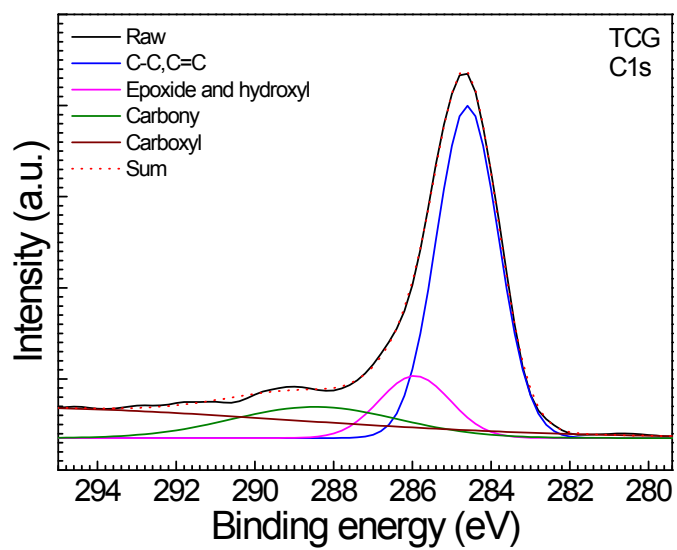

**Figure S5.** Fine XPS C1s spectrum of TCG.

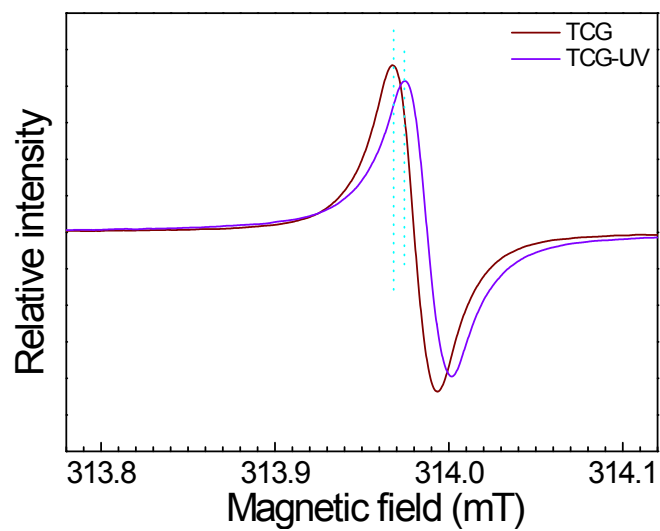

**Figure S6.** ESR of TCG and TCG-UV.

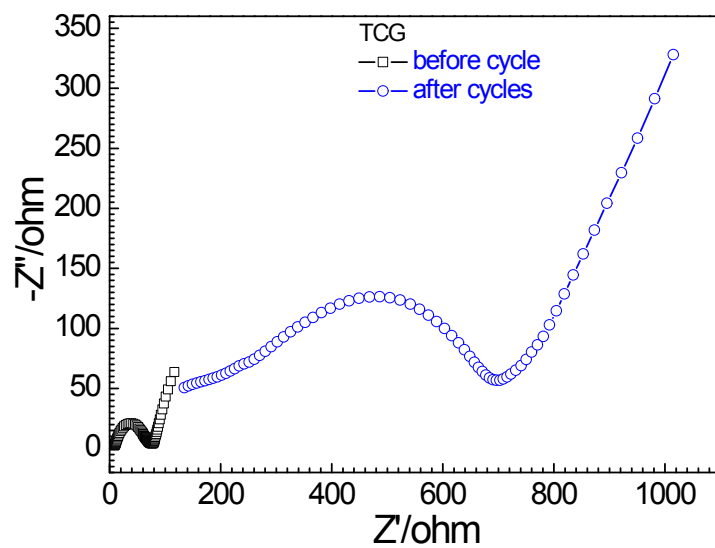

**Figure S7.** EIS of TCG composite before cycle and after cycles.

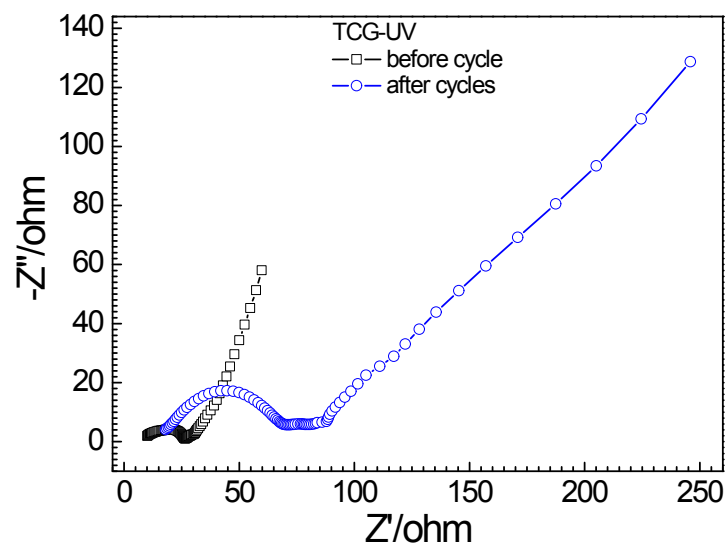

**Figure S8.** EIS of TCG-UV composite before cycle and after cycles.
